# Supplementary material
Source: bioRxiv or medRxiv preprint supplement (https://medrxiv.org/highwire/filestream/93827/field_highwire_adjunct_files/1/2020.08.18.20177410-2.pdf)
Supplement: Supplementary file [file 2020.08.18.20177410-2.pdf]

**Appendix 2: Multivariable linear regression of potential predictors on Stress and burnout**

|                                   | <i>Perceived stress scores</i>      |                 |         |                                     |                 |        | <i>Burnout scores</i>               |                 |        |                                     |                 |        |                      |                 |         |
|-----------------------------------|-------------------------------------|-----------------|---------|-------------------------------------|-----------------|--------|-------------------------------------|-----------------|--------|-------------------------------------|-----------------|--------|----------------------|-----------------|---------|
|                                   | Dichotomized at middle score (>=20) |                 |         | Dichotomized at median score (>=16) |                 |        | Dichotomized at middle score (≥3.0) |                 |        | Dichotomized at median score (≥2.4) |                 |        | Log of burnout score |                 |         |
|                                   | <i>OR</i>                           | <i>[95% CI]</i> |         | <i>OR</i>                           | <i>[95% CI]</i> |        | <i>OR</i>                           | <i>[95% CI]</i> |        | <i>OR</i>                           | <i>[95% CI]</i> |        | <i>β</i>             | <i>[95% CI]</i> |         |
| Perceived preparedness            |                                     |                 |         |                                     |                 |        |                                     |                 |        |                                     |                 |        |                      |                 |         |
| Not at all prepared               | 0.00                                | [0              | 0]      | 0.00                                | [0              | 0]     | 0.00                                | [0              | 0]     | 0.00                                | [0              | 0]     | 0.00                 | [0              | 0]      |
| Somewhat prepared                 | -0.68*                              | [-1.30          | -0.072] | -0.89*                              | [-1.57          | -0.21] | -1.08***                            | [-1.70          | -0.47] | -1.18***                            | [-1.86          | -0.50] | -0.21***             | [-0.32          | -0.10]  |
| Prepared                          | -1.10**                             | [-1.87          | -0.32]  | -1.09**                             | [-1.87          | -0.32] | -1.15**                             | [-1.90          | -0.40] | -1.46***                            | [-2.25          | -0.68] | -0.26***             | [-0.39          | -0.12]  |
| Provider type                     |                                     |                 |         |                                     |                 |        |                                     |                 |        |                                     |                 |        |                      |                 |         |
| Doctor                            | 0.00                                | [0              | 0]      | 0.00                                | [0              | 0]     | 0.00                                | [0              | 0]     | 0.00                                | [0              | 0]     | 0.00                 | [0              | 0]      |
| Nurse/related                     | -0.13                               | [-0.83          | 0.57]   | 0.29                                | [-0.35          | 0.94]  | -0.32                               | [-0.95          | 0.30]  | -0.28                               | [-0.91          | 0.35]  | -0.02                | [-0.14          | 0.095]  |
| Other                             | 0.30                                | [-0.50          | 1.11]   | 0.11                                | [-0.65          | 0.88]  | -0.80                               | [-1.62          | 0.015] | -0.49                               | [-1.28          | 0.30]  | -0.08                | [-0.22          | 0.067]  |
| Region                            |                                     |                 |         |                                     |                 |        |                                     |                 |        |                                     |                 |        |                      |                 |         |
| Greater Accra/Ashanti             | 0.00                                | [0              | 0]      | 0.00                                | [0              | 0]     | 0.00                                | [0              | 0]     | 0.00                                | [0              | 0]     | 0.00                 | [0              | 0]      |
| Northern region                   | -0.85*                              | [-1.61          | -0.088] | -0.64                               | [-1.34          | 0.057] | -0.50                               | [-1.21          | 0.20]  | -0.39                               | [-1.11          | 0.33]  | -0.13                | [-0.26          | 0.0048] |
| Other Northern                    | -0.15                               | [-0.93          | 0.63]   | 0.11                                | [-0.62          | 0.84]  | -0.11                               | [-0.90          | 0.68]  | -0.35                               | [-1.10          | 0.41]  | -0.07                | [-0.21          | 0.073]  |
| other Southern                    | -0.54                               | [-1.23          | 0.15]   | -0.11                               | [-0.74          | 0.52]  | -0.39                               | [-1.08          | 0.30]  | -0.55                               | [-1.21          | 0.11]  | -0.11                | [-0.23          | 0.011]  |
| Facility type                     |                                     |                 |         |                                     |                 |        |                                     |                 |        |                                     |                 |        |                      |                 |         |
| Teaching hospital                 | 0.00                                | [0              | 0]      | 0.00                                | [0              | 0]     | 0.00                                | [0              | 0]     | 0.00                                | [0              | 0]     | 0.00                 | [0              | 0]      |
| Regional/district hospital        | 0.31                                | [-0.44          | 1.06]   | 0.09                                | [-0.58          | 0.75]  | 0.13                                | [-0.54          | 0.81]  | 0.11                                | [-0.59          | 0.81]  | -0.03                | [-0.15          | 0.090]  |
| Health center/Other govt facility | 0.26                                | [-0.58          | 1.11]   | -0.08                               | [-0.78          | 0.63]  | 0.21                                | [-0.56          | 0.97]  | 0.27                                | [-0.49          | 1.03]  | -0.02                | [-0.14          | 0.11]   |
| Private/mission facility          | -0.02                               | [-0.91          | 0.87]   | -0.10                               | [-0.88          | 0.69]  | -0.48                               | [-1.33          | 0.38]  | 0.24                                | [-0.59          | 1.06]  | -0.01                | [-0.15          | 0.13]   |
| Years experience                  |                                     |                 |         |                                     |                 |        |                                     |                 |        |                                     |                 |        |                      |                 |         |
| 5 or less years                   | 0.00                                | [0              | 0]      | 0.00                                | [0              | 0]     | 0.00                                | [0              | 0]     | 0.00                                | [0              | 0]     | 0.00                 | [0              | 0]      |
| 6 to 10 years                     | 0.47                                | [-0.088         | 1.03]   | 0.39                                | [-0.12          | 0.90]  | 0.38                                | [-0.17          | 0.93]  | 0.38                                | [-0.15          | 0.90]  | 0.08                 | [-0.021         | 0.17]   |
| More than 10 years                | 0.26                                | [-0.42          | 0.95]   | 0.33                                | [-0.28          | 0.94]  | 0.62                                | [-0.051         | 1.30]  | 0.56                                | [-0.065         | 1.18]  | 0.11*                | [0.00033        | 0.23]   |
| Gender                            |                                     |                 |         |                                     |                 |        |                                     |                 |        |                                     |                 |        |                      |                 |         |
| Male                              | 0.00                                | [0              | 0]      | 0.00                                | [0              | 0]     | 0.00                                | [0              | 0]     | 0.00                                | [0              | 0]     | 0.00                 | [0              | 0]      |
| Female                            | 0.19                                | [-0.29          | 0.68]   | -0.07                               | [-0.53          | 0.39]  | 0.32                                | [-0.14          | 0.78]  | 0.27                                | [-0.20          | 0.74]  | 0.11*                | [0.024          | 0.19]   |
| Marital status                    |                                     |                 |         |                                     |                 |        |                                     |                 |        |                                     |                 |        |                      |                 |         |
| Single                            | 0.00                                | [0              | 0]      | 0.00                                | [0              | 0]     | 0.00                                | [0              | 0]     | 0.00                                | [0              | 0]     | 0.00                 | [0              | 0]      |
| Married                           | -0.29                               | [-0.85          | 0.27]   | -0.47                               | [-0.98          | 0.042] | -0.84**                             | [-1.39          | -0.28] | -0.76**                             | [-1.28          | -0.24] | -0.14**              | [-0.23          | -0.049] |
| Appreciation from management      |                                     |                 |         |                                     |                 |        |                                     |                 |        |                                     |                 |        |                      |                 |         |
| Not /somewhat appreciative        | 0.00                                | [0              | 0]      | 0.00                                | [0              | 0]     | 0.00                                | [0              | 0]     | 0.00                                | [0              | 0]     | 0.00                 | [0              | 0]      |
| Appreciative/Very appreciative    | -0.38                               | [-0.88          | 0.12]   | -0.75***                            | [-1.20          | -0.30] | -0.72**                             | [-1.21          | -0.22] | -0.67**                             | [-1.15          | -0.20] | -0.13**              | [-0.22          | -0.042] |
| Support from family               |                                     |                 |         |                                     |                 |        |                                     |                 |        |                                     |                 |        |                      |                 |         |
| Not/a little supportive           | 0.00                                | [0              | 0]      | 0.00                                | [0              | 0]     | 0.00                                | [0              | 0]     | 0.00                                | [0              | 0]     | 0.00                 | [0              | 0]      |
| Supportive/Very Supportive        | -0.63**                             | [-1.11          | -0.15]  | -0.59*                              | [-1.05          | -0.12] | -0.43                               | [-0.91          | 0.046] | -0.61*                              | [-1.09          | -0.13] | -0.13**              | [-0.22          | -0.040] |
| Fearful of contracting COVID-19   |                                     |                 |         |                                     |                 |        |                                     |                 |        |                                     |                 |        |                      |                 |         |
| Not/a little fearful              | 0.00                                | [0              | 0]      | 0.00                                | [0              | 0]     | 0.00                                | [0              | 0]     | 0.00                                | [0              | 0]     | 0.00                 | [0              | 0]      |
| Fearful/Very fearful              | 0.67**                              | [0.18           | 1.15]   | 0.28                                | [-0.17          | 0.73]  | 0.40                                | [-0.063         | 0.86]  | 0.64**                              | [0.19           | 1.09]  | 0.11**               | [0.027          | 0.19]   |
| Constant                          | 0.16                                | [-0.96          | 1.27]   | 1.70**                              | [0.55           | 2.84]  | 1.46*                               | [0.35           | 2.57]  | 2.12***                             | [0.99           | 3.25]  | 3.92***              | [3.73           | 4.11]   |
| Observations                      | 414.00                              |                 |         | 414.00                              |                 |        | 409.00                              |                 |        | 409.00                              |                 |        | 409.00               |                 |         |
| R-squared                         |                                     |                 |         |                                     |                 |        |                                     |                 |        |                                     |                 |        | 0.20                 |                 |         |

95% confidence intervals in brackets \* p<0.05 \*\* p<0.01 \*\*\* p<0.001
